# Supplementary material
Source: HighWire-hosted journal article supplement (https://www.cmaj.ca/content/suppl/2020/04/30/192.15.E417)
Supplement: santeAppendix2may2020.pdf [file santeAppendix2may2020.pdf]

# LE « CALME » AVANT LA TEMPÊTE

Wendy Glauser | CMAJ | 27 mars 2020

Cet article a été publié le 27 mars 2020 dans le

**cmaj**

L

'épidémie canadienne de COVID-19 n'a pas encore atteint son sommet, mais les travailleurs de la santé en ressentent déjà les conséquences psychologiques.

Ces temps-ci, rares sont ceux qui n'éprouvent aucune anxiété, en particulier chez les travailleurs de la santé, qui se préparent au pire alors que les cas se multiplient au Canada. Certains ont à composer avec de longs quarts de travail, des enfants à la maison et des parents âgés qui ont besoin de soins. D'autres choisissent de s'isoler pour ne pas contaminer leurs proches au cas où ils tomberaient malades, dans un contexte où les fournitures et l'équipement de protection se raréfient. D'autres encore s'inquiètent des décisions déchirantes qu'ils devront prendre si le nombre de patients dépasse celui des respirateurs artificiels disponibles.

La D<sup>re</sup> Mamta Gautam, une psychiatre spécialisée dans le bien-être des médecins, a entendu des collègues parler de « trouble de stress prétraumatique » pour décrire leur état d'esprit. Récemment, elle a commencé à tenir des visioconférences Zoom pour offrir du soutien à ses pairs.

« Les images venant d'autres pays sont frappantes et difficiles à oublier. [Ici,] nous sentons que c'est le calme avant la tempête, et que nous nous préparons mentalement à affronter les prochaines semaines », explique-t-elle.

## SE PRÉPARER À LA CRISE

Il est parfois impossible de mettre ses inquiétudes de côté; la D<sup>re</sup> Gautam recommande donc d'y consacrer 20 minutes par jour.

« Les ruminer plus longtemps ne sert à rien », précise-t-elle.

Essayez de colmater le plus de fuites possible dans votre « réservoir d'énergie » en déléguant ou en abandonnant certaines tâches. « Il n'est peut-être pas nécessaire de ranger la salle de jeux », suggère-t-elle. Certains travailleurs doivent également veiller à remplir leurs réservoirs en adoptant des routines et en consacrant du temps aux relations énergisantes, en prenant une marche ou en clavardant avec un ami.

Selon le D<sup>r</sup> Robert Mauner, chef de la recherche au service de psychiatrie de l'Hôpital Mount Sinai, l'attente qui précède un événement traumatique est « presque toujours pire que l'exposition elle-même », parce que les gens tendent à s'imaginer des scénarios catastrophiques. Pendant

l'épidémie de SRAS, en 2003, de 18 % à 57 % des travailleurs de la santé ont vécu une importante détresse émotionnelle, mais très peu ont eu des dommages psycho-logiques permanents.

Dans une vidéo récente sur les moyens de gérer la situation, le D<sup>r</sup> Mauner et son collègue psychiatre, le D<sup>r</sup> Jon Hunter, encouragent leurs collègues à se concentrer sur les éléments qu'ils peuvent contrôler.

« Un grand nombre d'éléments échappent à notre contrôle », explique le D<sup>r</sup> Mauner, mais les travailleurs de la santé ont une influence sur beaucoup d'autres. Il donne un exemple : « J'ai une bonne formation. Je connais les techniques de lavage des mains. Je sais comment mettre et enlever correctement mon équipement de protection individuelle. »

Avec ses collègues de l'Hôpital Mount Sinai, il effectue des tournées en santé mentale, allonge les périodes de consultations sans rendez-vous pour les professionnels de la santé et forme des pairs aidants dans chaque service hospitalier.

## AFFRONTER LA TEMPÊTE

La gentillesse et la compassion sont essentielles en temps de crise. D'après le D<sup>r</sup> Mauner, une bonne partie du stress lié à l'épidémie de SRAS de 2003 avait des racines « interpersonnelles » et était due au manque de communication entre les travailleurs de première ligne, les gestionnaires et les dirigeants. « Tout le monde était épuisé, et la fatigue rend grincheux », explique-t-il.

Selon la D<sup>re</sup> Gautam, il ne faut pas oublier que les décideurs et nos collègues font de leur mieux pour s'adapter à la situation, qui change d'heure en heure. « Nous sommes tous humains, et nous nous occupons d'autres humains », rappelle-t-elle; se concentrer sur ce fait permet de renforcer le sentiment de connexion et d'apaiser le ressentiment.

Les travailleurs de la santé peuvent trouver utile de se remémorer la raison pour laquelle ils ont choisi leur profession, et de rappeler à leurs collègues de faire de même. « Ce sont la flamme et la passion qui nous encouragent à continuer. Ne l'oublions pas : c'est ce qui nous permettra de progresser ensemble. »

Le D<sup>r</sup> Mauner appelle ce phénomène la « recherche de sens ». La solidarité qui nous unit à nos collègues, la compassion envers les patients et le dévouement à l'égard du travail

sont essentiels pour affronter les événements extrêmement difficiles, ajoute-t-il.

Lorsqu'on se sent dépassé par la situation, il est normal de se poser des questions, de se demander à quoi ça rime. Selon lui, les réponses « nous rappellent toujours nos valeurs ».

## ET ENSUITE ?

Le D<sup>r</sup> Sandro Galea, doyen de l'École de santé publique de l'Université de Boston, a beaucoup écrit sur les répercussions mentales des événements « inattendus, majeurs et traumatiques », comme l'ouragan Katrina et l'épidémie de SRAS. Il précise que les populations touchées présentent des taux accrus de dépression, de toxicomanie et de trouble de stress post-traumatique durant des mois et même des années après l'événement.

Certains travailleurs de la santé ne remarqueront pas les effets psychologiques de la pandémie avant qu'elle ne soit terminée.

« À court terme, on s'adapte aux facteurs de stress », explique-t-il. Quand ils se concentrent sur leurs besoins immédiats et ceux de leur famille et de leurs patients, les travailleurs mettent souvent consciemment de côté leurs réactions émotionnelles. Une fois la crise terminée, la crainte, la tristesse, l'anxiété, la culpabilité et la colère réprimées peuvent alors revenir en force.

Ce retard explique l'impossibilité de poser un diagnostic de TSPT moins d'un mois après l'exposition au traumatisme, précise le D<sup>r</sup> Galea. « Il faut attendre la fin de la période d'adaptation. »

C'est pourquoi les travailleurs de la santé doivent pouvoir bénéficier de services de soutien une fois la crise terminée, et être prévenus des effets à long terme.

La normalisation des effets psychologiques d'une crise peut encourager les personnes touchées à demander de l'aide. D'après une étude effectuée par le D<sup>r</sup> Mauner et ses collègues sur les travailleurs de la santé ayant lutté contre l'épidémie de SRAS à Toronto, les professionnels qui sentaient avoir la formation et le soutien nécessaires à leur travail risquaient moins de souffrir d'un trouble psychiatrique dans les années suivantes.

Les solutions systémiques à long terme – comme l'élimination des horaires surchargés et la réduction de la violence dans le service des urgences – sont également essentielles pour aider les travailleurs de la santé à surmonter les périodes difficiles, selon le D<sup>r</sup> Mauner. « Les solutions les plus efficaces ne seront pas individuelles, mais systémiques. » ■
